# Supplementary material
Source: PubMed Central journal article supplement (PMC1797087)
Supplement: hesr0041-1221sm.pdf [file hesr0041-1221sm.pdf]

**Appendix A.           The *Translating Research Into Action for Diabetes* (TRIAD)  
Study Group**

**Pacific Health Research Institute (PHRI):** *Principal Investigator:* J. David Curb, MD, MPH. *Co-Investigators:* Beth Waitzfelder, MA; Richard Chung, MD (Hawaii Medical Service Association); Peggy Latare, MD (Kaiser Permanente Hawaii); Lynette Honbo, MD (Hawaii State Department of Human Services); Adams Dudley, MD (University of California, San Francisco); Beatrice Rodriguez, MD, PhD; Robert Abbott, PhD; *Consultant:* Joseph Humphry, MD (Hawaii Medical Service Association); *Analysts:* Rebecca Glavan; Andrew White, PhD (Hawaii Medical Service Association); Ken Forbes (Kaiser Permanente Hawaii); James Cooper, MA (Hawaii State Department of Human Services); *Administrative Assistants:* Ruth Baldino; Esther Nakano.

**Indiana University Translational Research Center:** *Principal Investigator:* David G. Marrero, PhD. *Project Coordinator:* Susanna R. Williams, MSPH. *Co-Investigators:* Morris Weinberger, PhD; William M. Tierney, MD; M. Sue Kirkman, MD.

**Kaiser Foundation Research Institute:** *Principal Investigator and Study Chairman:* Joe V. Selby, MD, MPH.; *Co-Principal Investigator:* Andrew J. Karter, PhD; MS. *Co-Investigators:* Assiamira Ferrara, MD, PhD., *Project Director:* Bix E. Swain.

**University of California Los Angeles School of Medicine:** *Principal Investigator:* Carol M. Mangione, MD, MSPH; *Co Principal Investigator:* Arleen F. Brown, MD, PhD. *Project Director:* Rebecca Brusuelas. *Co-Investigators:* Martin F. Shapiro, MD, PhD; Susan L. Ettner, PhD.; Shaista Malik, MD. *Data Analysts:* Peter R. Gutierrez; W. Neil Steers, PhD. *Senior Administrator:* Carole Nagy.

**University of Medicine and Dentistry of New Jersey (UMDNJ):** *Principal Investigator:*

Norman Lasser, MD, PhD; *Co-Investigator/Project Director:* Dorothy A. Caputo, MA, APRN, BC-ADM, CDE; *Co-Investigators:* Monika M. Safford, MD; David Kountz, MD; Patricia Prata, MPH, CHES; Louise Russell, PhD; *Data Analysts:* Weichung J. Shih, PhD; Shou-En Lu, PhD; *Research Associate:* Ahmus Mahmoud, MBBA; *Administrative Specialist:* Patricia Walter.

**UMDNJ Central Coordinating Center:**

*Administrative Coordinator:* Gabrielle Davis, BA, CHES; *Program Specialists:* Patricia Prata, MPH, CHES, Sonja Ross, MA, Lucyna Lis, MA.

**The University of Michigan Health System:** *Principal Investigator:* *William H. Herman,*

*MD, MPH.* *Co-Principal Investigator:* *Catherine Kim, MD, MPH.;* *Project Director:* *Jennifer Goewey, MSA.* *Programmer/Analyst:* *Diane Kennedy.* *Research Associates:* *Ray Burke, MA; Bahman Tabaei, MPH; Honghong Zhou; Laura McEwen, MPH.* *Administrative Assistant:* *Barbara Pearlman.*

**TRIAD-Veterans Association:** *Principal Investigator:* *Rodney Hayward, MD.* *Co-*

*Principal Investigator:* *Eve Kerr, MD, MPH;* *Co-Investigators:* *Sarah Krein, PhD; John Piette, PhD;* *Project Managers:* *Fatima Makki, MPH, MSW; Jill Baker, MSW;* *Data Manager:* *Jennifer Davis, MPH.*

**TRIAD-wide Administrative Data Coordinator:** *Barbara R.K. Smith, MHSA.*

**Social & Behavioral Research Institute, California State University San Marcos:**

*Richard Serpe, PhD; Allen J. Risley, MS.*

**National Institute of Diabetes and Digestive and Kidney Diseases: *Sanford A.***

*Garfield, PhD.*

**Division of Diabetes Translation; Centers for Disease Control and Prevention:**

Principal Scientist: K.M. Venkat Narayan, MD, MPH, M.B.A. Co-Scientists: Theodore Thompson, MS; Edward W. Gregg, PhD; Robert Gerzoff, MS; Michael M. Engelgau, MD,MS; Gloria Beckles, MB.BS, M.Sc, Patrick Boyle, PhD; Mark Stevens, MSPH, MA; David F. Williamson, PhD; Project Administrator: Bernice Moore, M.B.A.

**Appendix B. Survey question regarding payment methodology**

In the past year, approximately what percent of your overall payments to primary care physicians occurred by..... (the total should add to 100%; if not, please explain)

- a. \_\_\_\_\_ % direct salary (not at risk)
- b. \_\_\_\_\_ % fixed capitation to individual clinician (i.e., a per member per month base rate)
- c. \_\_\_\_\_ % fee-for-service(i.e., payment of a dollar amount per service provided)
- d. \_\_\_\_\_ % performance-dependent payments (i.e., at risk through risk pools, withholds, incentives/bonuses.etc)
- e. \_\_\_\_\_ % Other: Describe\_\_\_\_\_

**Appendix C. Patient-Level Characteristics of TRIAD Sample (N=6,194)**

| <b>Characteristic</b>                                                          | <b>Percent or Mean<br/>(Std. Dev.)</b> |
|--------------------------------------------------------------------------------|----------------------------------------|
| Female                                                                         | 53 %                                   |
| <u>Race/Ethnicity</u>                                                          |                                        |
| Hispanic/Latino                                                                | 17 %                                   |
| Black Non-Hispanic                                                             | 15 %                                   |
| White Non-Hispanic                                                             | 45 %                                   |
| Asian/Pacific Islander                                                         | 15 %                                   |
| Other                                                                          | 9 %                                    |
| <u>Education</u>                                                               |                                        |
| < High School                                                                  | 22 %                                   |
| High School Graduate                                                           | 29 %                                   |
| Some College                                                                   | 29 %                                   |
| ≥ 4 Years of College                                                           | 20 %                                   |
| <u>Annual Income</u>                                                           |                                        |
| <\$15,000                                                                      | 29 %                                   |
| \$15,000 to \$39,999                                                           | 32 %                                   |
| \$40,000 to \$74,999                                                           | 23 %                                   |
| >\$75,000                                                                      | 15 %                                   |
| Age (in years)                                                                 | 62 (SD = 13)                           |
| Duration of diabetes                                                           | 12 (SD = 11)                           |
| PCS 12                                                                         | 43 (SD = 7)                            |
| MCS 12                                                                         | 45 (SD = 6)                            |
| Charlson Index                                                                 | 2.3 (SD = 1.6)                         |
| <u>Diabetes Medications</u>                                                    |                                        |
| Insulin                                                                        | 29 %                                   |
| Oral Medications Only                                                          | 62 %                                   |
| No medications                                                                 | 8 %                                    |
| Has Medicare as secondary insurance                                            | 27%                                    |
| Has another public insurance (Medicaid, VA, or "Other") as secondary insurance | 10%                                    |
| Has another private insurance as secondary insurance                           | 4%                                     |
